# Supplementary material
Source: ML conference proceedings conference paper supplement (https://proceedings.neurips.cc/paper_files/paper/2019/hash/bdf3fd65c81469f9b74cedd497f2f9ce-Abstract.html)
Supplement: Supplementary file [file bdf3fd65c81469f9b74cedd497f2f9ce-Supplemental.zip]

---

# Learning to Infer Implicit Surfaces without 3D Supervision – Supplemental Materials

---

Anonymous Author(s)

Affiliation

Address

email

## 1 More Results

2 We show more results of our approach in Figure 1 and Figure 2.

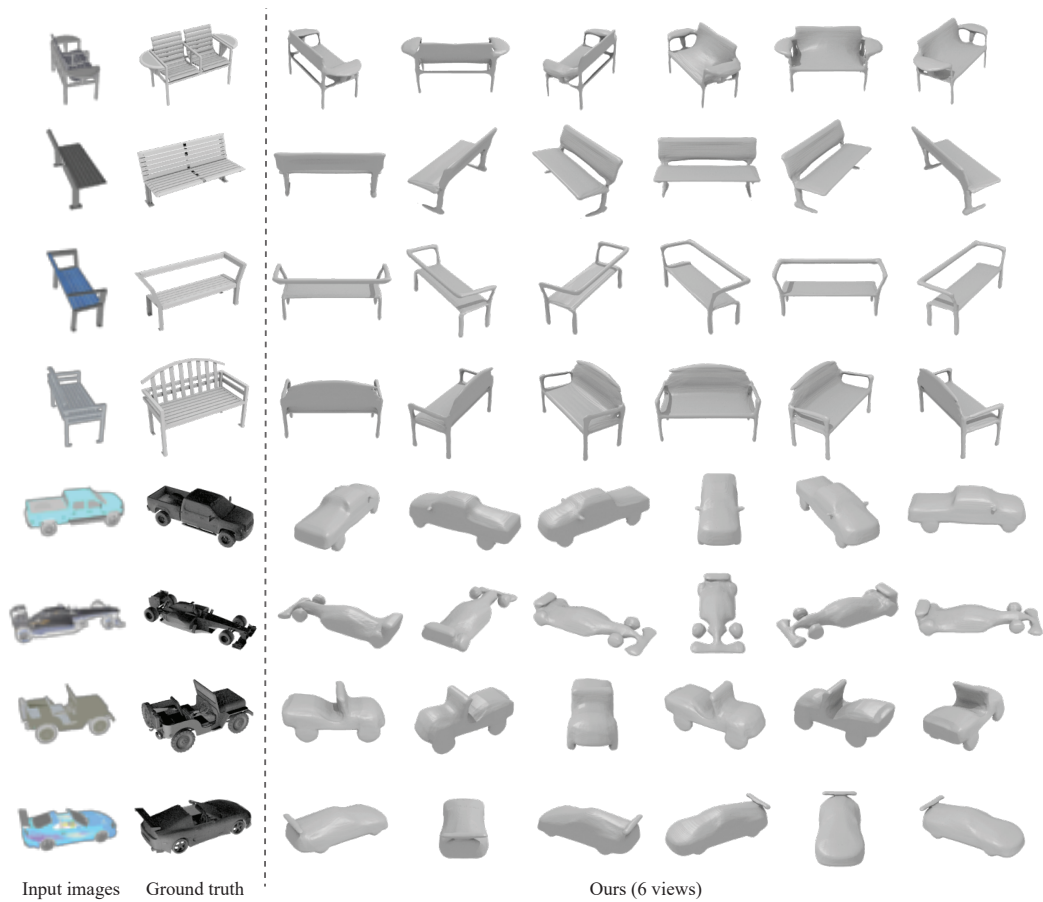

Figure 1: More single-view reconstruction results of our approach on bench and car categories.

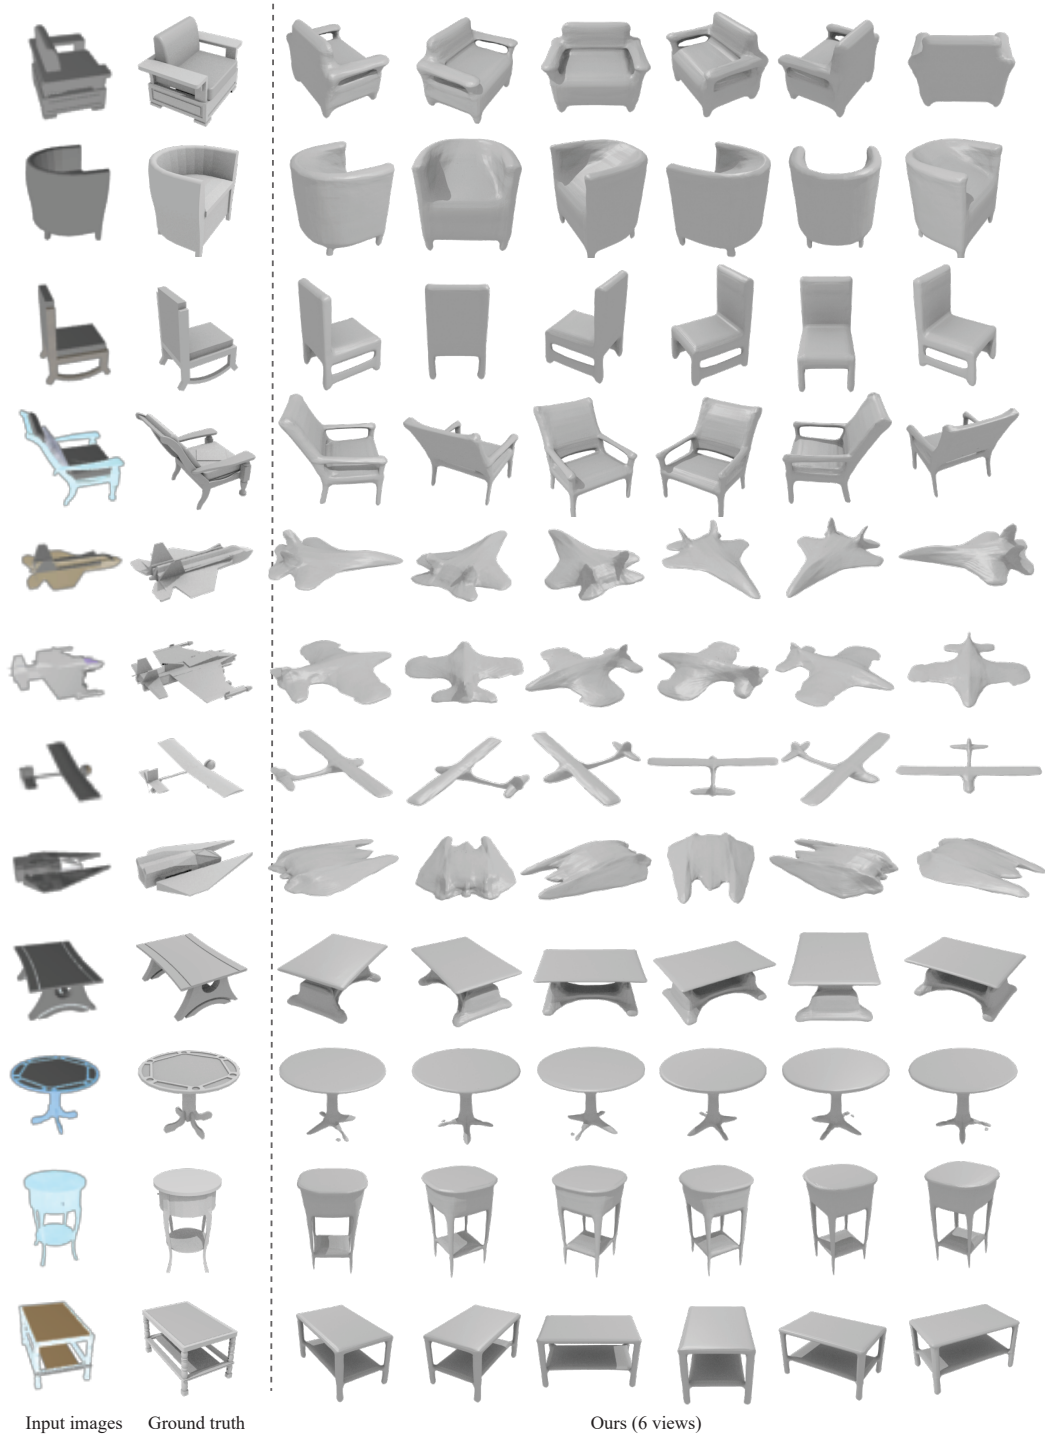

Figure 2: More single-view reconstruction results of our approach on chair, plane and table categories.
